1 **Title: Multiple Myeloma: Combination Therapy of BET Proteolysis Targeting Chimeric**  
2 **Molecule with CDK9 Inhibitor**

3 Su-Lin Lim<sup>\*1¶</sup>, Liang Xu<sup>2¶</sup>, Bing-Chen Han<sup>1</sup>, Pavithra Shyamsunder<sup>2</sup>, Wee-Joo Chng<sup>2</sup>, H. Phillip  
4 Koeffler<sup>1-2</sup>

5 <sup>1</sup> Cedars Sinai Medical Center, Los Angeles, California, United States of America

6 <sup>2</sup> Cancer Science Institute of Singapore, National University of Singapore, Singapore.

7 \* Corresponding author

8 Email address: [sulin\\_lim\\_86@hotmail.com](mailto:sulin_lim_86@hotmail.com)

9 ¶These authors contributed equally to this work.

10

11

12

13

14

15

16

17

18

19

20

21 **Abstract:**

22 Cyclin Dependent Kinase 9 (CDK9) associates with Bromodomain and Extra-Terminal Domain  
23 (BET) proteins to promote transcriptional elongation by phosphorylation of serine 2 of RNAP II  
24 C-terminal domain. We examined the therapeutic potential of selective CDK9 inhibitors (AZD  
25 4573 and MC180295) against human multiple myeloma cells *in vitro*. Short-hairpin RNA silencing  
26 of CDK9 in Multiple Myeloma (MM) cell lines reduced cell viability compared to control cells  
27 showing the dependency of MM cells on CDK9. In order to explore synergy with the CDK9  
28 inhibitor, proteolysis targeting chimeric molecule (PROTAC) ARV 825 was added. This latter  
29 drug causes ubiquitination of BET proteins resulting in their rapid and efficient degradation.  
30 Combination treatment of MM cells with ARV 825 and AZD 4573 markedly reduced their protein  
31 expression of BRD 2, BRD 4, MYC and phosphorylated RNA pol II as compared to each single  
32 agent alone. Combination treatment synergistically inhibited multiple myeloma cells both *in vitro*  
33 and *in vivo* with insignificant weight loss. The combination also resulted in marked increase of  
34 apoptotic cells at low dose compared to single agent alone. Taken together, our studies show for  
35 the first time that the combination of a BET PROTAC (ARV 825) plus AZD 4573 (CDK9 inhibitor)  
36 is effective against MM cells.

37

38

39

40

41

## 42 **Introduction:**

43 Multiple myeloma (MM) is a clonal plasma cell malignancy. It is the second most common  
44 hematologic malignancy in United States <sup>1</sup>. Despite advances in treatment such as proteasome  
45 inhibitors and immunomodulatory drugs, the disease remains incurable. Bromodomain and Extra-  
46 Terminal Domain (BET) family is composed of BRD-2, -3, -4 and -T. They facilitates  
47 transcriptional activation by RNA polymerase II (RNAP II) <sup>2</sup>. ARV 825 (Arvinas, Inc) is a hetero-  
48 bifunctional molecule composed of a Bromodomain binding moiety (OTX 015) joined to  
49 pomalidomide. Pomalidomide binds to an intracellular E3 ubiquitin ligase, cereblon (CRBN);  
50 OTX 015 brings the complex to the BET molecules. This variety of inhibitor is called PROTAC  
51 (Proteolysis Targeting Chimeric molecules) which in this case causes ubiquitination of BET  
52 proteins resulting in rapid and efficient degradation of these proteins<sup>3</sup>. BET PROTAC ARV 825  
53 inhibits the proliferation of MM cells both in vitro and in vivo <sup>4,5</sup>.

54

55 Cyclin Dependent Kinase 9 (CDK9) is the kinase subunit of the positive transcription elongation  
56 factor b (P-TEFb) that associates with BET proteins which promotes transcriptional elongation by  
57 phosphorylation of serine 2 of RNAPII C-terminal domain (CTD)<sup>6</sup>. CDK9 has a major 42kDa and  
58 a minor 55kDa isoform. The 55kDa isoform is at an upstream transcriptional start site of the 42  
59 kDa protein. Both are expressed in human cancer cell lines and in normal tissues <sup>7</sup>. The 42 kDa  
60 isoform is localized diffusely in the nucleoplasm, whereas the 55 kDa accumulates in the  
61 nucleolus<sup>8</sup>. CDK9 has been shown to play an important role in controlling global transcription,  
62 including expression of genes regulated by super-enhancers, such as MYC, MCL-1 and cyclin  
63 D1<sup>9</sup>. MCL-1 and MYC are critical for proliferation of MM cells, often causing resistance to drugs

64 and producing relapse in these patients <sup>10,11</sup>. Therefore, CDK9 may represent a druggable target in  
65 myeloma having dysregulated MYC expression <sup>12,13</sup>.

66

67 Inhibition of both CDK9 and BRD 4 has been reported synergistically to induce growth arrest and  
68 apoptosis of cancer cells including MM <sup>14,15</sup>. Previously studied CDK inhibitors (eg. Flavopiridol  
69 and SNS-032) are not selective to CDK9, inhibiting other CDKs and enzymes. Their lack of  
70 selectivity and decreased potency may contribute to many adverse effects in clinical trials <sup>8</sup>.  
71 Therefore, selective inhibitors of CDK9 are needed to prevent the undesirable off-target effects  
72 and to enhance potency.

73

74 AZD 4573 is highly potent against CDK9 (<3 nM IC<sub>50</sub>) and selective (>10 fold) against CDK9.  
75 The drug results in caspase activation and loss of viability across a diverse set of hematological  
76 cancers including MM <sup>16</sup>. MC180295 is also a highly selective CDK9 inhibitor (> 22 fold, IC<sub>50</sub> =  
77 5 nM) that has broad anti-cancer activity *in vitro* and *in vivo* <sup>17</sup>. In this study, we noted that AZD  
78 4573 and MC180295 *in vitro* inhibited the viability of MM cells. We also showed that AZD 4573  
79 is synergistic with ARV 825 in inducing apoptosis and inhibiting MM cell proliferation both *in*  
80 *vitro* and *in vivo*.

81

82

83

84

85

86

## 87 **Materials and Methods:**

### 88 **Cell Culture**

89 Human MM cell lines: KMS11, KMS28, KMS18, KMS12, MM1S, MM1R, H929, 8226,  
90 8226 LR5 and 8226 P100V were kind gifts from Dr. W.J. Chng (Cancer Science Institute of  
91 Singapore, Singapore) and KMS11 res and MM1S res were generous gifts from Dr. A.K. Stewart  
92 (Mayo Clinic, Arizona). All cell lines were cultured and maintained in RPMI1640 with 10% fetal  
93 bovine serum (FBS) and 1% penicillin-streptomycin (Invitrogen, Carlsbad, CA) at 37°C with 5%  
94 CO<sub>2</sub>. The 8226 LR5 cells were maintained in 10 nM Melphalan, the 8226 P100V cells were  
95 cultured with 100 nM bortezomib for 2 days every 2 weeks.

96

### 97 **Cell Proliferation Assay**

98 Twenty thousand cells were seeded in 96-well plates followed by drug treatment. After 72 h culture,  
99 10 µl of MTT (2-(4,5-dimethylthiazol-2-yl)-2,5-diphenyltetrazolium bromide) was added to the  
100 wells and cultured at 37°C for an additional 4 h followed by addition of 100 µl stop solution (10%  
101 Sodium Dodecyl Sulphate). Plates were measured with a spectrophotometer at 570 nm absorbance.  
102 IC<sub>50</sub> values were calculated using Graph Pad Prism.

103

### 104 **Annexin V and Propidium Iodide (Annexin V-PI) Apoptosis Analysis**

105 Cells were treated with different concentrations of ARV 825 for 48 h. Staining was performed  
106 using Apoptosis Detection Kit II (BD Biosciences, USA). Cells were harvested and washed twice

107 with phosphate-buffered saline (PBS, Life technologies, USA), suspended in 1X binding buffer  
108 with 5  $\mu$ l of FITC conjugated Annexin V and 5  $\mu$ l of PI for 15 min in the dark at room temperature.  
109 Samples were analyzed using flow cytometric analysis (Sony SA3800). Cells positive for Annexin  
110 and PI were defined as apoptotic cells.

111

## 112 **Cell Cycle Analysis**

113 Cells were treated with different concentrations of AZD 4573 (24 h), fixed with 70% chilled  
114 ethanol, washed with PBS two times and stained with PI solution [40  $\mu$ g/ml PI, Triton X-100 (1%),  
115 20  $\mu$ g/ml DNase-free RNase A in PBS] for 30 min at 37 °C in the dark followed by flow cytometric  
116 analysis (Sony SA3800).

117

## 118 **Drug Combination Study**

119 Results from MTT assays with different combinations of ARV 825 and AZD 4573 were evaluated  
120 by CompuSyn<sup>18</sup>(ComboSyn, Inc, Paramus, NJ). A combination index (CI) plot is a Fa-CI plot in  
121 which  $CI < 1$ ,  $= 1$ ,  $> 1$  indicate synergism, additive and antagonism, respectively. Fa: fraction of  
122 proliferation inhibition by the drug.

123

124

125

## 126 **Reagents and Antibodies**

127 ARV 825 was developed by the C.M. Crew's laboratory (Department of Chemistry, Yale  
128 University, New Haven, CT, USA). We obtained the drug from Chemietek (Indianapolis, IN,  
129 USA). MC180295 was a generous gift from Dr. H.H. Zhang and J.P. Issa (Temple University,  
130 Philadelphia). We obtained AZD 4573 from MedChemExpress (New Jersey, USA). For *in vitro*  
131 administration, ARV 825, AZD 4573 and MC180295 were dissolved in dimethyl sulfoxide  
132 (Sigma-Aldrich) (10 mM) and stored at -80°C. List of antibodies and inhibitors is present in S1  
133 Table.

134

## 135 **Western Blot Analysis**

136 Cellular lysates were prepared using M-PER mammalian protein extraction reagent (Thermo  
137 Scientific, Rockford, USA) containing 1X protease cocktail inhibitor (Roche, Switzerland). After  
138 20 min incubation on ice, lysates were centrifuged (14,000g, 30 min, 4°C). Total protein  
139 concentrations were measured by Pierce Coomassie Plus (Bradford) assay kit (Thermo Fisher  
140 Scientific). Twenty micrograms of protein were loaded per lane on SDS-PAGE gel and resolved  
141 at 90 voltages, followed by transfer to PVDF (Millipore, Massachusetts). Membranes were  
142 blocked with 5% non-fat milk and incubated with antibodies.

143

144

145

## 146 **Lentiviral Production and Silencing of CDK9**

147 shRNA targeting CDK9 was cloned into pLKO.1 lentiviral vector (Sequence: Forward:  
148 CCGGGTTCGACTTCTGCGAGCATGACTCGAGTCATGCTCGCAGAAGTCGAACTTTTG  
149 Reverse:AATTCAAAAAGTTCGACTTCTGCGAGCATGACTCGAGTCATGCTCGCAGAA  
150 GTCGAC. Luciferase vector was purchased from Addgene (plasmid #17477). Recombinant  
151 lentiviral vector and packaging vector (pCMV-dR8.9 and pMD2.G-VSVG) were cotransfected  
152 into 293 FT cells using polyethylenimine (PEI) according to the manufacturer's instructions. Virus  
153 supernatants were harvested at 48h and 72h after transfection, and placed through a 0.45  $\mu$ m filter.  
154 8226 and KMS28 cells ( $1 \times 10^6$  per well) were seeded in 6-well plates. Cells were transduced with  
155 lentiviral vectors in the presence of 8  $\mu$ g/ml polybrene (Sigma-Aldrich) for 24 h. Stable cell lines  
156 were selected with puromycin.

157

## 158 **In Vivo Xenografts**

159 *In vivo* studies were performed with a protocol approved by the Institutional Animal Care and Use  
160 Committee at Cedars Sinai Medical Center. To access the *in vivo* activity of ARV 825, KMS11  
161 expressing luciferase (KMS11<sup>LUC</sup>) were injected into lateral tail vein of SCID-Beige mice. Mice  
162 were monitored for 7 days and imaged by Xenogen IVIS spectrum (PerkinElmer, Massachusetts)  
163 camera to document engraftment before treatment was initiated. At 7 days after mice were injected  
164 with cells, they were randomly divided into four groups (5 mice in each group) [vehicle (5%  
165 Kolliphor® HS15), 5 mg/kg of ARV 825 (intraperitoneal injection daily for 28 days), 10 mg/kg  
166 of AZD 4573 (intraperitoneal injection, twice a day with 2 h interval for two consecutive  
167 days/week for 4 weeks) and combination of ARV 825 and AZD 4573]. Tumor burden in each



168 treatment group was monitored daily and imaged weekly by Xenogen camera for 28 days. The  
169 mice were then euthanized within 24 hours after the end of experiment. No mice died before the  
170 end of experiment. For euthanasia, the mice received isoflurane overdose followed by cervical  
171 dislocation. All research personnel in mice study were trained for animal care and welfare  
172 according to IACUC protocol.

173

## 174 **Statistical Analysis**

175 For *in vitro* and *in vivo* experiments, the statistical significance of difference between two groups  
176 used two-tailed student t-test and two-way ANOVA. Asterisks in the figures represent significant  
177 differences between experimental groups in comparison to controls (\*  $p < 0.01$ , \*\*  $p < 0.001$ ,  
178 \*\*\*  $p < 0.0001$ ). Data points in figures represent means  $\pm$  SD (standard deviation).

179

## 180 **Results:**

### 181 **CDK9 inhibitors (AZD 4573 and MC180295) decreased cellular** 182 **proliferation of MM cells.**

183 AZD 4573 and MC180295 (CDK9 inhibitors) in a dose-dependent manner were tested against a  
184 panel of 12 human MM cell lines (KMS11, MM1R, KMS12BM, H929, KMS18, 8226 LR5,  
185 MM1S, KMS11 res, 8226, KMS28, 8226 P100V, MM1S res) using an *in vitro* proliferation assay  
186 (MTT, 72 h). Cell lines included melphalan-resistant (8226 LR5), steroid-resistant (MM1R),  
187 bortezomib-resistant (8226 P100V) and lenalidomide-resistant (KMS11res and MM1Sres) cell

188 lines. Some of the cell lines have cytogenetics associated with a poor prognosis [e.g. t(4:14):  
189 KMS11, KMS28, H929; t(14:16): MM1S, 8226]. All MM cell lines were sensitive to AZD 4573  
190 with  $IC_{50}$  ranging from 8 – 60 nM (Fig 1A). MM1S, MM1Sres, MM1R and KMS11 cell lines ( $IC_{50}$   
191 = 8 nM) were most sensitive to AZD 4573; whereas 8226 P100V was a relatively more resistant  
192 cell line ( $IC_{50}$  = 70 nM) (S2 Table). The data showed that AZD 4573 was effective even if the cells  
193 were resistant to either melphalan, lenalidomide, steroid, bortezomib or they had a cytogenetically  
194 unfavorable chromosome. MC180295 was not as potent as AZD 4573 against MM cell lines with  
195  $IC_{50}$  ranging from 260 nM to >1000 nM (Fig 1B). H929 was the most sensitive ( $IC_{50}$  = 260 nM),  
196 whereas 8226 P100V was the relatively resistant cell line to MC180295 ( $IC_{50}$  > 1000 nM) (S2  
197 Table).

198

199 **Figure 1: CDK9 inhibitors: anti-proliferative activities against MM cells.** (A) Twelve MM  
200 cell lines were cultured with AZD 4573 (1 nM-62.5 nM, 72 h). Growth inhibition was measured  
201 by MTT assays. Results are mean  $\pm$  SD, N=3.  $IC_{50}$ s are shown in Supplementary Table 2. (B) MM  
202 cells treated with MC180295 (1 nM-1,000 nM, 72 h). Growth inhibition was measured by MTT  
203 assays. Results are mean  $\pm$  SD, N=3.  $IC_{50}$ s are shown in S2 Table.

204

## 205 **Silencing of CDK9 reduced cell proliferation and viability of MM** 206 **cells**

207 To examine the dependency of MM cells on CDK9 expression, we performed short hairpin RNA  
208 (shRNA)-mediated silencing of CDK9 in KMS28 and 8226 cell lines. RT-qPCR and western blot

209 analysis confirmed the successful silencing of CDK9 using shRNA in these cells (Figs 2A-B, left  
210 upper and lower panel). Silencing CDK9 in 8226 and KMS28 cell lines reduced cell viability  
211 compared to control cells (MTT, 72 h) (Figs 2A-B, right panel).

212

213 **Figure 2: shRNA mediated silencing of CDK9 decreased proliferation of MM cells.** (A) Levels  
214 of CDK9 mRNA (Left, upper panel) and protein (Left, lower panel) after shRNA-mediated  
215 silencing of 8226 cells. Cell proliferation assay (MTT) after shRNA silencing of 8226 cells (right  
216 panel). (B) Levels of CDK9 mRNA (left, upper panel) and protein (left, lower panel) after shRNA-  
217 mediated silencing of CDK9 in KMS28 cell line. Cell proliferation assays (MTT) after shRNA  
218 silencing of CDK9 in KMS28 cell line (right panel). Results are mean  $\pm$  SD, N=3.

219

220 **ARV 825 and AZD 4573 showed synergistic growth inhibitory**  
221 **activity against MM cell lines**

222 The IC<sub>50</sub> of ARV 825 against KMS11, 8226 and KMS28 MM cells are 9 nM, 84 nM and 137 nM,  
223 respectively (S3 Table). Combination of ARV 825 and AZD 4573 treatment for 72h showed  
224 synergistic growth inhibitory activity against these MM cells (Combination Index < 1) (Fig 3).  
225 The combination index analysis is shown in S4 Table.

226

227 **Figure 3: Combination index plot of ARV 825 with AZD 4573 against MM cells.** Synergistic  
228 growth inhibition of KMS11, KMS28 and 8226 cells when ARV 825 and AZD 4573 are combined  
229 (72 h, MTT assay). CI < 1, CI = 1 and CI > 1 represent synergism, additive, and antagonism

230 respectively of the combination of the two compounds. Values of Combination Index analysis are  
231 shown in S4 Table.

232

233

234

235 **CDK9 inhibitor AZD 4573 downregulated phosphorylation of ser2**  
236 **pol II CTD, MCL-1 and MYC protein.**

237 We evaluated the protein expression of BRD 2, BRD 3, BRD 4, phosphorylated ser2 pol II carboxy  
238 terminal domain (Pol II CTD), total RNA polymerase II, MCL-1 and MYC in KMS11 and 8226  
239 cells after treatment with ARV 825 and AZD 4573 either as a single agent or in combination (7 h,  
240 ARV 825 [KMS11 (20 nM; 40 nM); 8226 (100 nM; 200 nM)], AZD 4573 [KMS11 (20 nM; 40  
241 nM); 8226 (60 nM; 120 nM)].

242

243 Protein levels of phosphorylated RNA pol II, MCL-1 and MYC decreased significantly after  
244 KMS11 and 8226 cells were treated with AZD 4573 [KMS11 (20 nM; 40 nM); 8226 (60 nM; 120  
245 nM, 7 h) whereas the total RNA pol II was not affected. In contrast, after ARV 825 treatment  
246 [KMS11 (20 nM;40 nM); 8226 (100 nM; 200 nM), 7 h] of KMS11 and 8226 cells, protein  
247 expression of BRD 2, BRD 3, BRD 4 and MYC reduced, but did not affect the protein expression  
248 of MCL-1 and phosphorylated RNA pol II (Figs 4A-B). Combination treatment (7 h) of ARV 825  
249 [KMS11 (20 nM;40 nM); 8226 (100 nM; 200 nM)] and AZD 4573 [KMS11 (20 nM; 40 nM);  
250 8226 (60 nM; 120 nM)] of KMS11 and 8226 cells markedly reduced their protein expression of

251 BRD 2, BRD 4, MYC and phosphorylated RNA pol II as compare to single agents alone (Figs 4A-  
252 B).

253

254

255 **Figure 4: Effect of ARV 825 and AZD 4573 on protein expression of BRD 2, BRD 3, BRD 4;**  
256 **phosphorylated Ser 2 RNA pol II; total RNA pol II; MCL-1 and MYC in MM cells. (A)**  
257 KMS11 cells were treated with ARV 825 (20 nM and 40 nM), AZD 4573 (20 nM and 40 nM) and  
258 their combination [ARV 825 + AZD 4573 (20 nM + 20 nM; 40 nM + 40 nM, respectively) for 7  
259 h; and protein expression was examined by western blot (GAPDH, internal control). (B) 8226 cells  
260 were treated with ARV 825 (100 nM and 200 nM), AZD 4573 (60 nM and 120 nM) and their  
261 combination [ARV 825 + AZD 4573 (100 nM + 60 nM; 200 nM + 120 nM, respectively) for 7 h;  
262 and protein expression was examined by western blot.

263

264 **AZD 4573 and ARV 825 combination markedly induced apoptosis in**  
265 **MM cells**

266 Flow cytometric analysis of KMS11 and 8226 MM cells showed a marked increase in the  
267 percentage of apoptotic cells after treatment with combination of ARV 825 and AZD 4573 for 48  
268 h compare to control cells. Either ARV 825 (2.5 nM) or AZD 4573 (2.5 nM) alone produced 26%  
269 and 13% apoptotic KMS11 cells, respectively; but their combination (2.5 nM + 2.5 nM) led to 67%  
270 apoptotic cells. Similarly, 8226 cells treated with either ARV 825 (20 nM) or AZD 4573 (10 nM)

271 alone led to 14% and 20% of apoptotic cells, respectively; but their combination (20 nM + 10 nM)  
272 led to 71% of apoptotic cells (Fig 5A).

273

274 Cell cycle analysis of MM cells was performed in the presence of various concentrations of AZD  
275 4573 for 24 h compare to control cells. AZD 4573 only produced a minimal dose-dependent  
276 increase in G1 phase, decrease S phase and G2/M phase in KMS11 and 8226 cell lines (Fig 5B).

277

278 **Figure 5: Apoptosis and cell cycle analysis of MM cells after treatment with ARV 825 and/or**

279 **AZD 4573.** (A) Apoptosis: KMS11 and 8226 MM cells were treated with of ARV 825 (2.5 nM;

280 20 nM), AZD 4573 (2.5 nM; 10 nM) and their combination (2.5 nM + 2.5 nM; 20 nM + 10 nM,

281 respectively) for 48 h, stained with annexin V-FITC and PI, and analyzed by flow cytometry.

282 Histograms represent percentage of apoptotic cells. Mean  $\pm$  SD of three independent experiments.

283 (B) Cell cycle: KMS11 and 8226 MM cells were treated for 24 h with either AZD 4573 (2.5-5 nM

284 or 5-10 nM, 24 h), respectively or diluent control (DMSO), stained with propidium iodide (PI) and

285 analyzed by flow cytometry. Histograms showed proportion of cells in different phases of cell

286 cycle. Representative of three independent experiments. \* $p \leq 0.01$ ; \*\* $p \leq 0.001$ ; \*\*\* $p \leq 0.0001$

287 for ARV 825 vs. control.

288

289 **Combination of AZD 4573 and ARV 825 inhibited MM cells in vivo**

290 Anti-proliferative effect of either ARV 825 or AZD 4573 alone or their combination was examined

291 *in vivo* against MM xenografts growing in SCID Beige mice. One week after injection, the MM

292 cells were observed by bioluminescence imaging; after which, mice (n=5 per group) were

293 randomly assigned to receive ARV 825 (5 mg/kg, IP daily), AZD 4573 (10 mg/kg, IP, twice a day  
294 with 2 h interval for two consecutive days/week) or combination treatment for a total duration of  
295 28 days. Control mice received vehicle alone. Bioluminescence was measured at days 0, 7, 14, 21,  
296 28. Combination of ARV 825 and AZD 4573 significantly ( $P < 0.001$ ) slowed tumor growth in  
297 experimental mice compared to single agent alone as measured by bioluminescence (Figs 6A-B)  
298 at days 21 and 28. ARV 825 and AZD 4573 alone or in combination did not affect either the normal  
299 activity or the weight (loss  $< 10\%$ ) of the mice (S1 Fig).

300

301 **Figure 6: AZD 4573 acts synergistically with ARV 825 in inhibiting MM cells In vivo.** (A)  
302 Whole-body bioluminescence images of SCID-beige mice after intravenous injection with  
303 KMS11<sup>LUC</sup> cells followed 7 days later by treatment with either ARV 825 (5 mg/kg IP daily for 28  
304 days) or AZD 4573 (10 mg/kg, IP, twice a day with 2 h interval for two consecutive days/week for  
305 4 weeks) as well as a combination of both drugs and vehicle control alone. (B) Tumor burden as  
306 measured by bioluminescence in SCID-beige mice after intravenous injection with KMS11<sup>LUC</sup>  
307 cells. Data represent mean  $\pm$  SD (N = 5 per group). \* $p \leq 0.01$ , \*\* $p \leq 0.001$ , \*\*\* $p \leq 0.0001$ .

308

## 309 **Discussion:**

310 Management of multiple myeloma remains challenging especially relapse/refractory MM despite  
311 major advancement in treatment. Therefore, new targeted therapies are urgently required. BET  
312 PROTAC and CDK9 inhibitors have shown promising results in preclinical studies against MM  
313 <sup>4,5,19,20</sup>. However, the limited clinical efficiency of CDK9 inhibitors due to side-effects and dose-  
314 limiting toxicities have prevented these drugs from receiving FDA approval. Hence, the need for

315 better CDK9 inhibitors <sup>8</sup>. In addition, combination therapies targeting multiple survival pathways  
316 may minimize adverse effects by reducing dosage and improving outcomes. Furthermore,  
317 targeting BRD 4 when also targeting CDK9 is able to block the compensatory increase in  
318 expression of MYC <sup>15</sup>.

319 AZD 4573 is a selective CDK9 inhibitor that led to dose- and time- dependent decrease in  
320 phosphorylated ser 2 RNAP II and loss of MCL1 mRNA and protein; also, the in vivo efficacy of  
321 the drug has been reported in multiple hematological tumors <sup>16</sup>. It is currently in phase I clinical  
322 trials for treatment of hematological malignancies <sup>21</sup>. MC180295 is a novel CDK9 inhibitor that is  
323 more selective against CDK9 than AZD 4573. However, MC180295 was not as potent as AZD  
324 4573 against MM cell lines. AZD4573 markedly decreased growth of almost all the MM cells  
325 having resistance to standard drugs. We performed shRNA mediated silencing of CDK9 against  
326 MM cells and found it paralleled the drugs' activity to inhibit proliferation and viability of MM  
327 cells.

328

329 In this study, we also demonstrated that combination of the BET PROTAC ARV 825 and the  
330 selective CDK9 inhibitor AZD 4573 synergistically caused significant growth inhibition of  
331 myeloma cells both in vitro and in an orthotopic xenograft model. Also, flow cytometric analysis  
332 demonstrated that low dose combination of ARV 825 and AZD 4573, as compare to single agent,  
333 induced enhanced apoptosis. These lower drug concentrations will minimize unwanted off target  
334 activity or side-effects. We observed only minimal G1 cell cycle arrest in KMS11 and 8226 cells  
335 after treatment with AZD 4573 suggesting that AZD 4573 probably does not inhibit the cell cycle  
336 as a mechanism of cell kill but it does block transcriptional elongation <sup>8</sup>.



337

338 We found that in MM cells AZD 4573 decreased phosphorylation of RNAP II, decreased anti-  
339 apoptotic proteins (MCL-1 and MYC), whereas ARV 825 degraded BET proteins and decreased  
340 expression of MYC. Combining both inhibitors synergistically inhibited cell growth of MM cells.  
341 Prior studies showed that inhibition of CDK9 paradoxically increased expression of MYC<sup>15</sup>. This  
342 did not occur with our drug combination. Our therapeutic targeting of MYC is important in MM  
343 because of the importance of this protein causing progression of MM. In summary, our studies  
344 showed for the first time that the combination of a BET PROTAC (ARV 825) plus AZD 4573  
345 (CDK9 inhibitor) is effective against MM.

346

## 347 **Acknowledgements:**

348 We express gratitude to Jean-Pierre Issa and Hang-Hang Zhang for providing the MC180295  
349 inhibitor.

350

## 351 **References**

- 352 1. Kazandjian D. Multiple myeloma epidemiology and survival: A unique malignancy. *Semin*  
353 *Oncol.* 2016;43: 676-681.
- 354 2. Shu S, Polyak K. BET Bromodomain Proteins as Cancer Therapeutic Targets. *Cold Spring*  
355 *Harb Symp Quant Biol.* 2016;81:123-129.
- 356 3. Lu J, Qian Y, Altieri M, et al. Hijacking the E3 Ubiquitin Ligase Cereblon to Efficiently  
357 Target BRD4. *Chem Biol.* 2015;22(6):755-763.

- 358 4. Lim SL, Damnernsawad A, Shyamsunder P, et al. Proteolysis targeting chimeric molecules  
359 as therapy for multiple myeloma: efficacy, biomarker and drug combinations.[prepublished  
360 online ahead of print January 2019]. *Haematologica*. doi:10.3324/haematol.2018.201483
- 361 5. Zhang X, Lee HC, Shirazi F, et al. Protein targeting chimeric molecules specific for  
362 bromodomain and extra-terminal motif family proteins are active against pre-clinical  
363 models of multiple myeloma. *Leukemia*. 2018;32(10):2224-2239.
- 364 6. Peterlin BM, Price DH. Controlling the Elongation Phase of Transcription with P-TEFb.  
365 *Mol Cell*. 2006;23(3):297-305.
- 366 7. Ma H, Seebacher NA, Hornicek FJ, Duan Z. Cyclin-dependent kinase 9 (CDK9) is a novel  
367 prognostic marker and therapeutic target in osteosarcoma. *EBioMedicine*. 2019;39:182-193.
- 368 8. Morales F, Giordano A. Overview of CDK9 as a target in cancer research. *Cell Cycle*.  
369 2016;15(4):519-527.
- 370 9. Boffo S, Damato A, Alfano L, Giordano A. CDK9 inhibitors in acute myeloid leukemia. *J*  
371 *Exp Clin Cancer Res*. 2018;37(1):36.
- 372 10. Lovén J, Hoke HA, Lin CY, et al. Selective inhibition of tumor oncogenes by disruption of  
373 super-enhancers. *Cell*. 2013;153(2):320-334.
- 374 11. Dai Y, Chen S, Pei XY, et al. Targeting CDK9 Dramatically Potentiates ABT-737-Induced  
375 Apoptosis in Human Multiple Myeloma Cells through a Bim-Dependent Mechanism. *Blood*.  
376 2009;114(22): Abstract 297.
- 377 12. Zhang Y, Zhou L, Leng Y, Dai Y, Orlowski RZ, Grant S. Positive transcription elongation  
378 factor b (P-TEFb) is a therapeutic target in human multiple myeloma. *Oncotarget*.

- 379 2017;8(35):59476-59491.
- 380 13. Hofmeister CC, Berdeja JG, Vesole DH, Suvannasankha A, Parrott T, Abonour R. TG02,  
381 an Oral CDK9-Inhibitor, in Combination with Carfilzomib Demonstrated Objective  
382 Responses in Carfilzomib Refractory Multiple Myeloma Patients. *Blood*. 2015;126(23).  
383 Abstract 3052.
- 384 14. Gerlach D, Tontsch-Grunt U, Baum A, et al. The novel BET bromodomain inhibitor BI  
385 894999 represses super-enhancer-associated transcription and synergizes with CDK9  
386 inhibition in AML. *Oncogene*. 2018;37(20):2687-2701.
- 387 15. Lu H, Xue Y, Yu GK, et al. Compensatory induction of MYC expression by sustained  
388 CDK9 inhibition via a BRD4-dependent mechanism. *Elife*. 2015;4:e06535
- 389 16. Cidado J, Proia T, Boiko S, et al. AZD4573, a novel CDK9 inhibitor, rapidly induces cell  
390 death in hematological tumor models through depletion of Mcl1. *Cancer Res*. 2018;78(13):  
391 Abstract 310.
- 392 17. Zhang H, Pandey S, Travers M, et al. Targeting CDK9 Reactivates Epigenetically Silenced  
393 Genes in Cancer. *Cell*. 2018;175(5):1244-1258.
- 394 18. Chou T, Martin N. CompuSyn for drug combinations: PC Software and User's Guide: a  
395 computer program for quantitation of synergism and antagonism in drug combinations, and  
396 the determination of IC50 and ED50 and LD50 values. ComboSyn Inc, Paramus, (NJ), 2005.
- 397 19. Dai Y, Grant S. Cyclin-dependent kinase inhibitors. *Curr Opin Pharmacol*. 2003;3(4):362-  
398 370.
- 399 20. Conroy A, Stockett DE, Walker D, et al. SNS-032 is a potent and selective CDK 2, 7 and 9

400 inhibitor that drives target modulation in patient samples. *Cancer Chemother Pharmacol.*  
401 2009;64(4):723-732.

402 21. Rule S, Kater AP, Brümmendorf TH, et al. A phase 1, open-label, multicenter, non-  
403 randomized study to assess the safety, tolerability, pharmacokinetics, and preliminary  
404 antitumor activity of AZD4573, a potent and selective CDK9 inhibitor, in subjects with  
405 relapsed or refractory hematological malignancies. *J Clin Oncol.* 2018;36(15)

406

## 407 **Supporting Information**

### 408 **S1 Table. List of antibodies**

| <b>List of antibodies</b> |                                       |
|---------------------------|---------------------------------------|
| <b>Antibodies</b>         | <b>Manufacturer</b>                   |
| BRD 2                     | Cell Signaling Technology, 5848       |
| BRD 3                     | Proteintech, 11859-1-AP               |
| BRD 4                     | Cell Signaling Technology, 13440      |
| CDK 9                     | Cell Signaling Technology, 2316T      |
| MCL 1                     | Cell Signaling Technology, 5453       |
| Phosphor- Rpb1 CTD (ser2) | Cell Signaling Technology, 13499      |
| Rpb1 CTD                  | Cell Signaling Technology, 2629       |
| <b>List of inhibitors</b> |                                       |
| <b>Inhibitors</b>         | <b>Manufacturer</b>                   |
| AZD 4573                  | MedChemExpress, Catalog no. HY-112088 |

|            |                               |
|------------|-------------------------------|
| Bortezomib | Selleckchem Catalog no. S1013 |
| Melphalan  | Selleckchem Catalog no. S8266 |

409

410

411 **S2 Table. IC50s of AZD 4573 against MM cells, 72 h**

| <b>Cell lines</b>                  | <b>AZD 4573 IC50s ± SD (nM), 72 h</b> |
|------------------------------------|---------------------------------------|
| MM1S (14:16)                       | 8 ± 0.6                               |
| KMS11 (4:14)                       | 8 ± 0.1                               |
| MM1S res (lenalidomide resistant)  | 8 ± 0.4                               |
| MM1R (steroid resistant)           | 8 ± 3.0                               |
| KMS11 res (lenalidomide resistant) | 9 ± 1.1                               |
| KMS18                              | 12 ± 1.1                              |
| KMS28 (4:14)                       | 17 ± 1.4                              |
| KMS12BM                            | 21 ± 2.1                              |
| H929                               | 20 ± 0.3                              |
| 8226 LR5 (Melphalan resistant)     | 22 ± 3.1                              |
| 8226 (14:16)                       | 23 ± 3.2                              |
| 8226 P100V (bortezomib resistant)  | 70 ± 4.4                              |
|                                    |                                       |
| <b>Cell lines</b>                  | <b>MC180295 IC50s ± SD (nM), 72 h</b> |
| H929                               | 260 ± 20                              |
| KMS11                              | 280 ± 23                              |
| KMS18                              | 330 ± 24                              |

|                                    |          |
|------------------------------------|----------|
| KMS11 res (lenalidomide resistant) | 330 ± 40 |
| MM1S                               | 340 ± 42 |
| MM1S res (lenalidomide resistant)  | 340 ± 42 |
| MM1R (steroid resistant)           | 350 ± 31 |
| 8226                               | 460 ± 43 |
| 8226 LR5 (Melphalan resistant)     | 520 ± 22 |
| KMS28                              | 510 ± 14 |
| KMS12BM                            | 700 ± 9  |
| 8226 P100V (bortezomib resistant)  | >1000    |

412

413 **S3 Table. IC50s of ARV 825 against MM cells, 72 h**

| Cell lines                         | ARV 825 IC50 ± SD (nM), 72 h |
|------------------------------------|------------------------------|
| KMS11                              | 9 ± 1.9                      |
| MM1R (Steroid resistant)           | 10 ± 1.8                     |
| KMS12BM                            | 11 ± 1.3                     |
| MM1S                               | 11 ± 1.8                     |
| H929                               | 16 ± 1.6                     |
| KMS18                              | 17 ± 1.1                     |
| 8226 LR 5 (Melphalan resistant)    | 20 ± 1.9                     |
| KMS11 res (Lenalidomide resistant) | 70 ± 1.4                     |

|                                   |           |
|-----------------------------------|-----------|
| U266                              | 71 ± 1.8  |
| 8226                              | 84 ± 1.4  |
| KMS28BM                           | 137 ± 1.1 |
| 8226 P100V (Bortezomib resistant) | 500 ± 0.6 |
| MM1S res (Lenalidomide resistant) | >500      |

414

415 **S4 Table. Combination Index.** Combination index of AZD 4573 synergistic with ARV 825 (CI  
 416 < 1, CI = 1 and CI > 1 represent synergism, additive and antagonism, respectively)

| <b>KMS11 (cell line)</b> |                |              |               |
|--------------------------|----------------|--------------|---------------|
|                          | <b>ARV 825</b> |              |               |
|                          | <b>2.5 nM</b>  | <b>5 nM</b>  | <b>10 nM</b>  |
| <b>AZD 4573</b>          |                |              |               |
| <b>2.5 nM</b>            | 0.75           | 0.71         | 0.82          |
| <b>5 nM</b>              | 0.83           | 0.85         | 1.1           |
| <b>8226 (cell line)</b>  |                |              |               |
|                          | <b>ARV 825</b> |              |               |
|                          | <b>40 nM</b>   | <b>80 nM</b> | <b>160 nM</b> |
| <b>AZD 4573</b>          |                |              |               |
| <b>12.5 nM</b>           | 0.38           | 0.36         | 0.40          |
| <b>25 nM</b>             | 0.63           | 0.66         | 0.71          |

| KMS28 (cell line) |         |        |        |
|-------------------|---------|--------|--------|
|                   | ARV 825 |        |        |
|                   | 50 nM   | 100 nM | 200 nM |
| AZD 4573          |         |        |        |
| 7.5 nM            | 0.61    | 0.65   | 0.62   |
| 15 nM             | 0.64    | 0.66   | 0.64   |

417  
418  
419  
420  
421

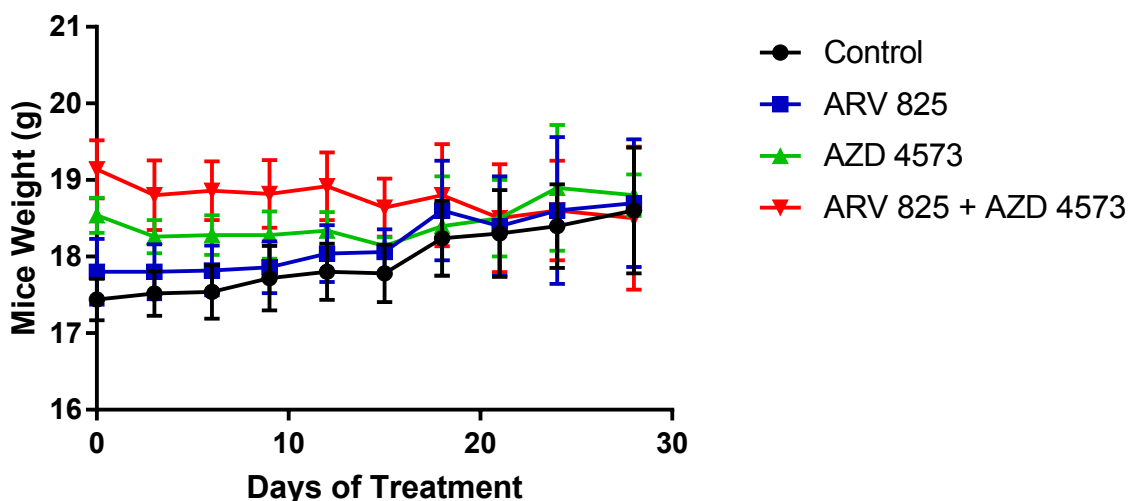

422  
423  
424  
425  
426  
427  
428  
429

**S1 Fig. Mice weight after treatment.** Comparison of weight of mice after treatment with ARV 825 (5 mg/kg IP daily for 28 days), AZD 4573 (10 mg/kg, IP, twice a day with 2 h interval for two consecutive days/week for 4 weeks), combination of both drugs or diluent control. Mean  $\pm$  SD of 5 mice in each group.



430

431

432

433

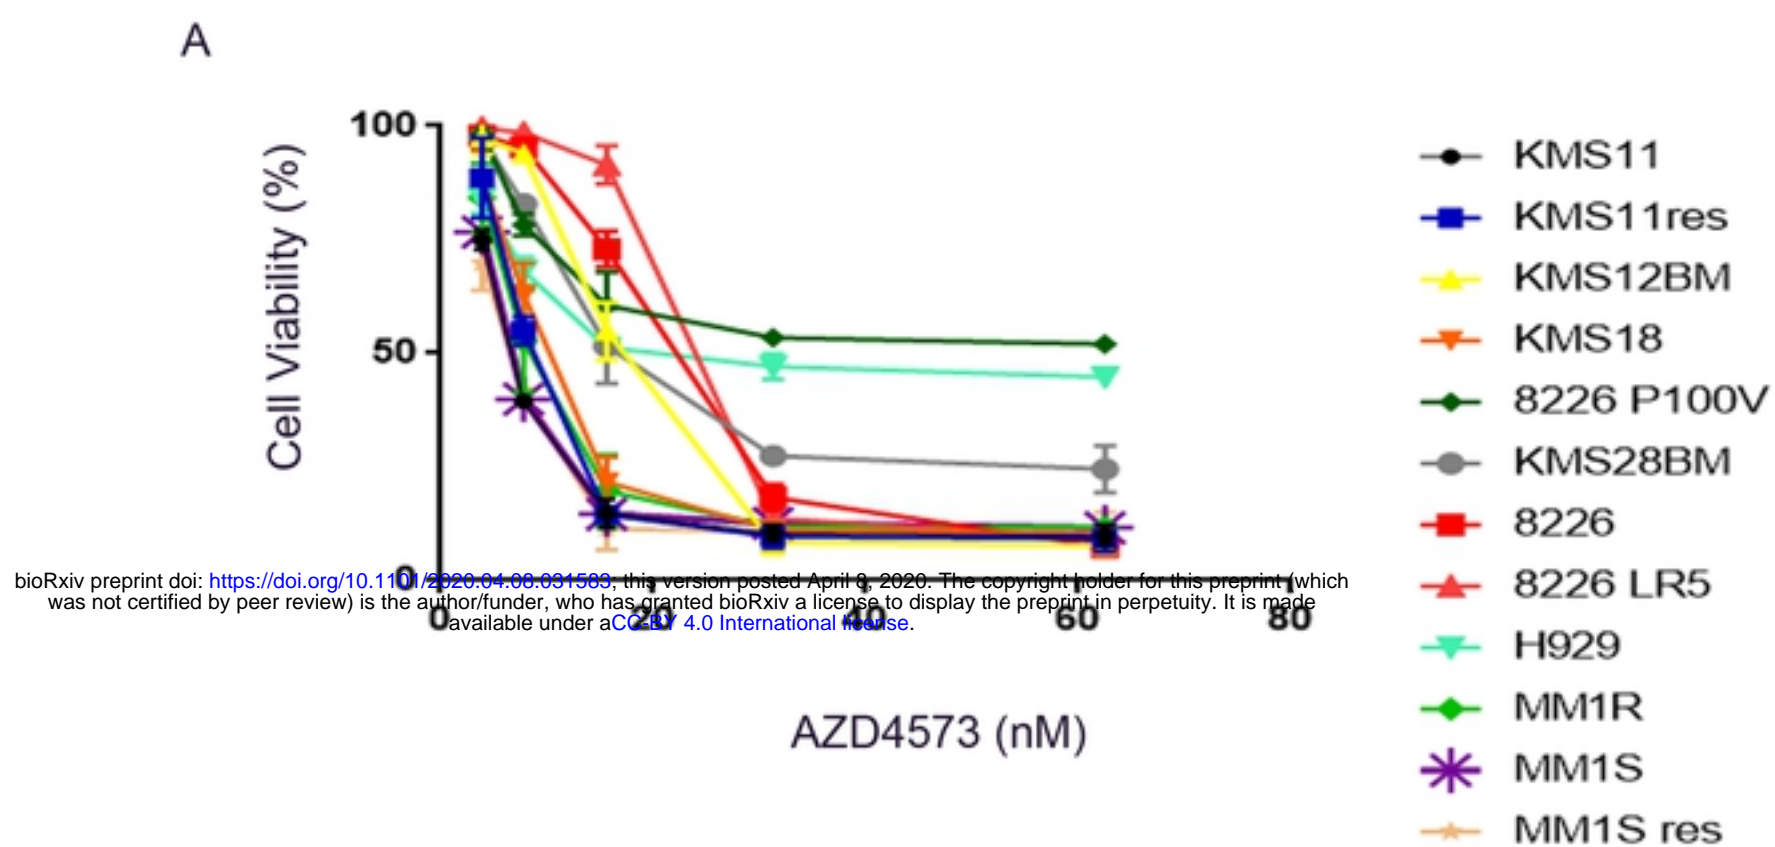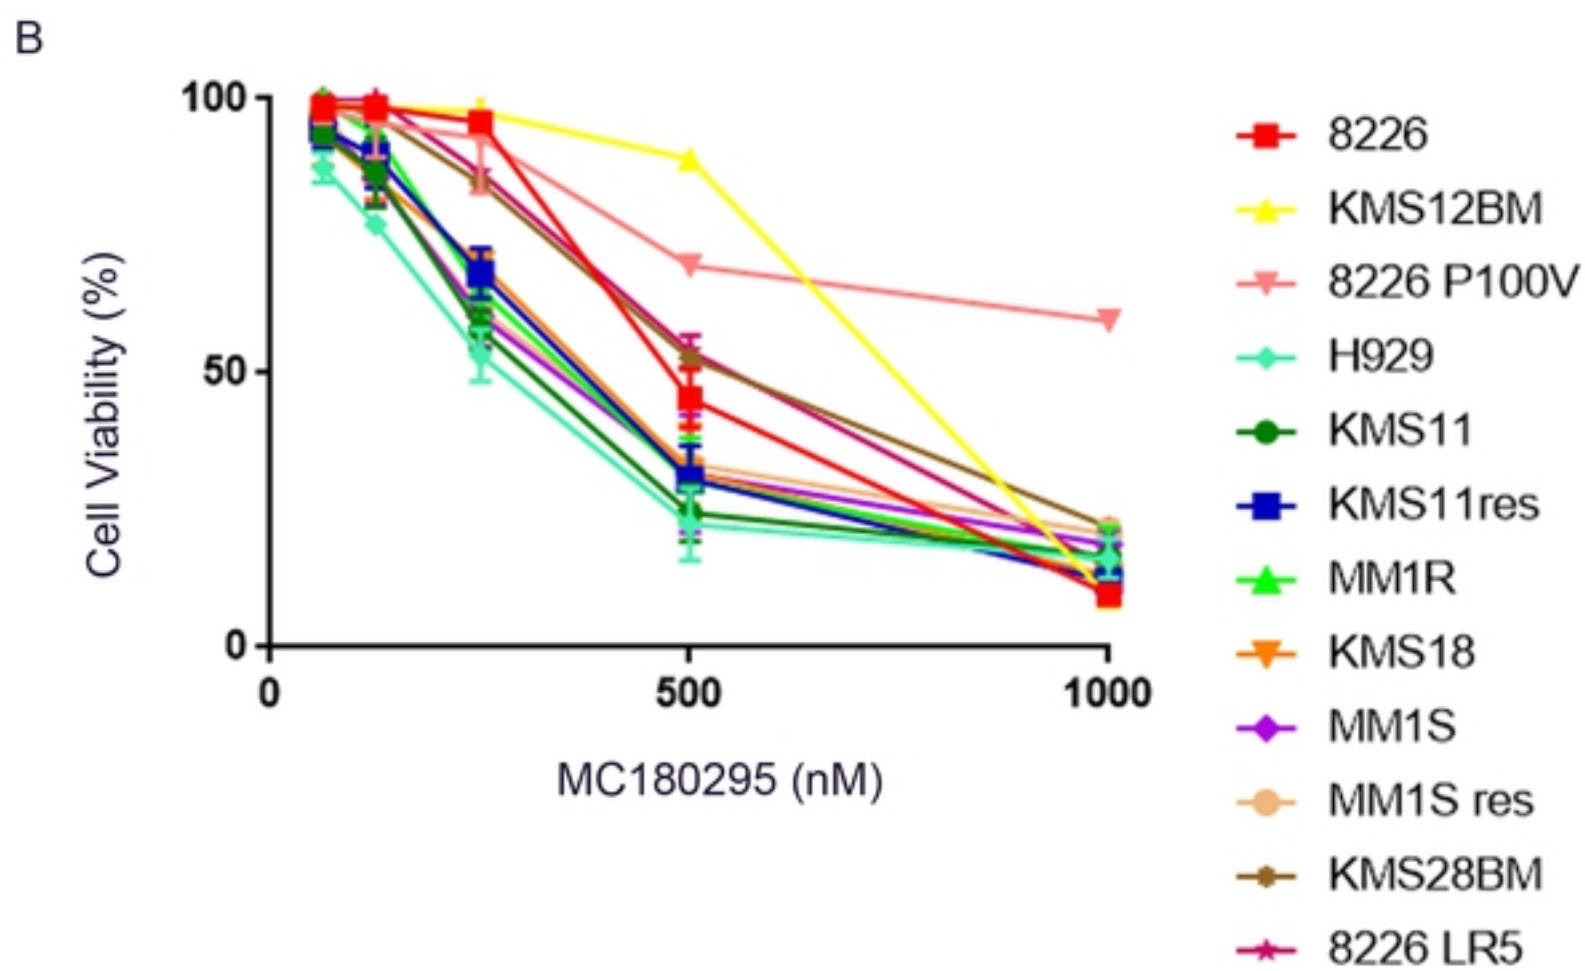

Fig 1

A

8226

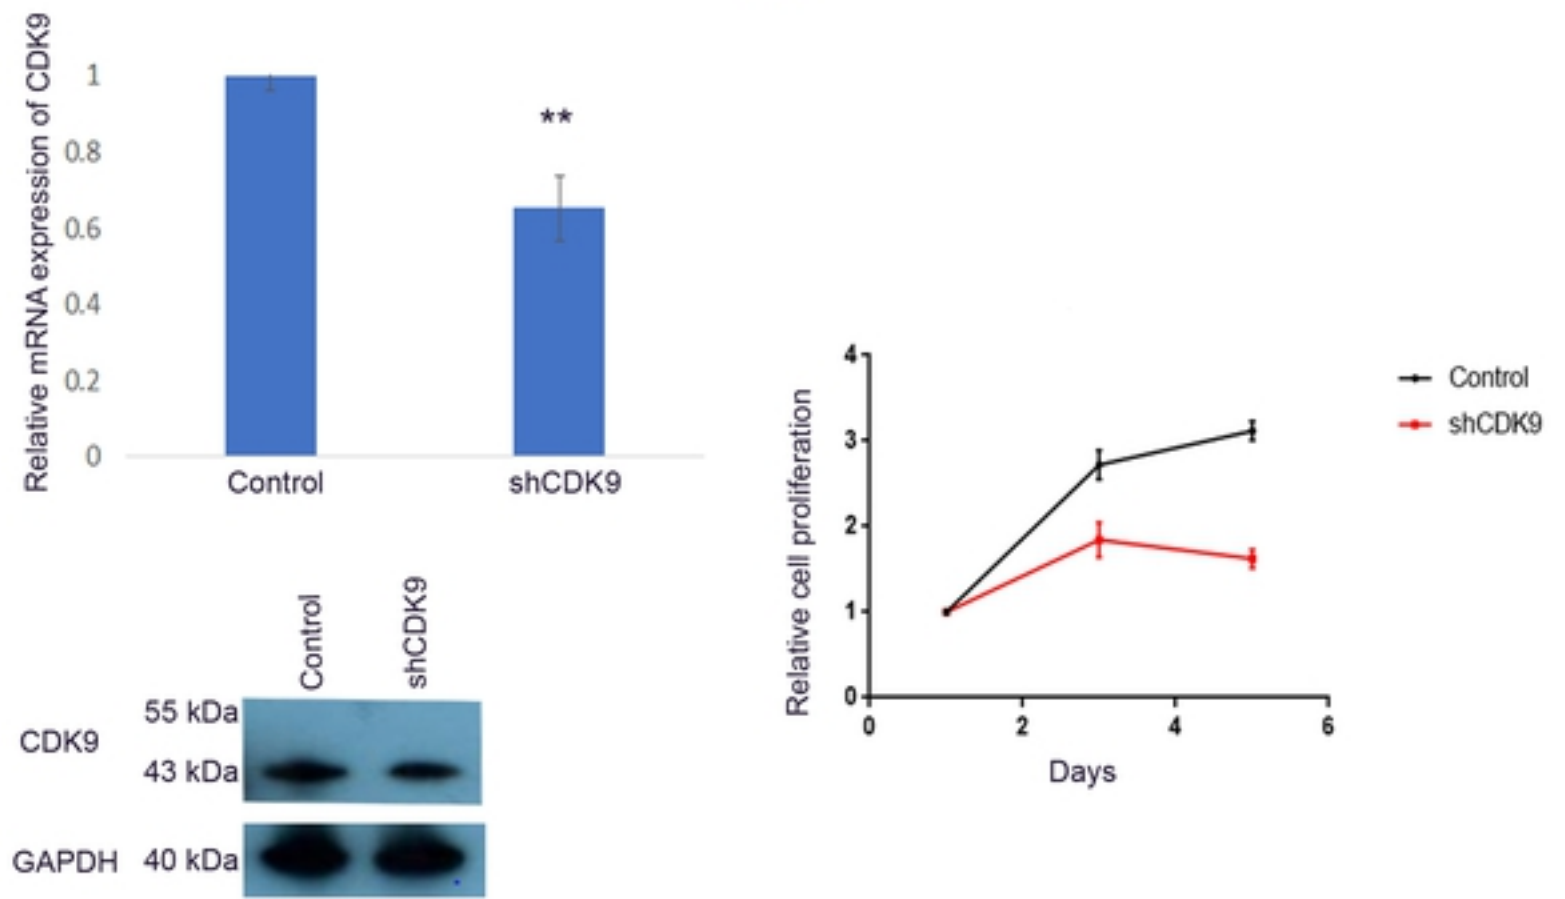

bioRxiv preprint doi: <https://doi.org/10.1101/2020.04.08.031583>; this version posted April 8, 2020. The copyright holder for this preprint (which was not certified by peer review) is the author/funder, who has granted bioRxiv a license to display the preprint in perpetuity. It is made available under aCC-BY 4.0 International license.

B

KMS28

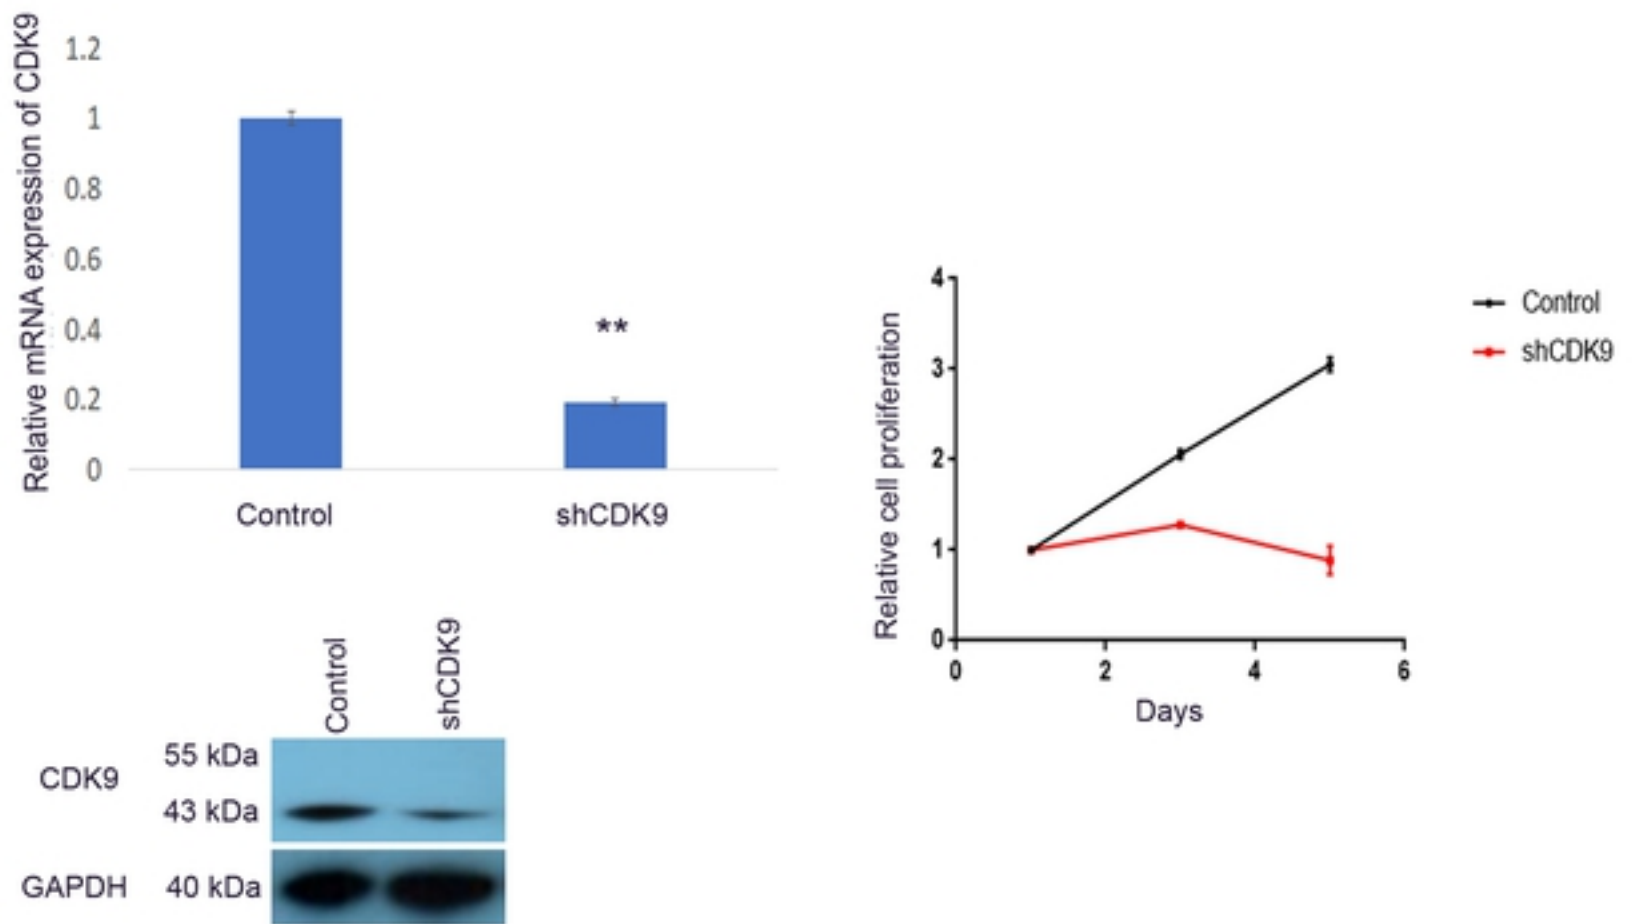

Combination Index: AZD4573 + ARV825, synergistic growth inhibition

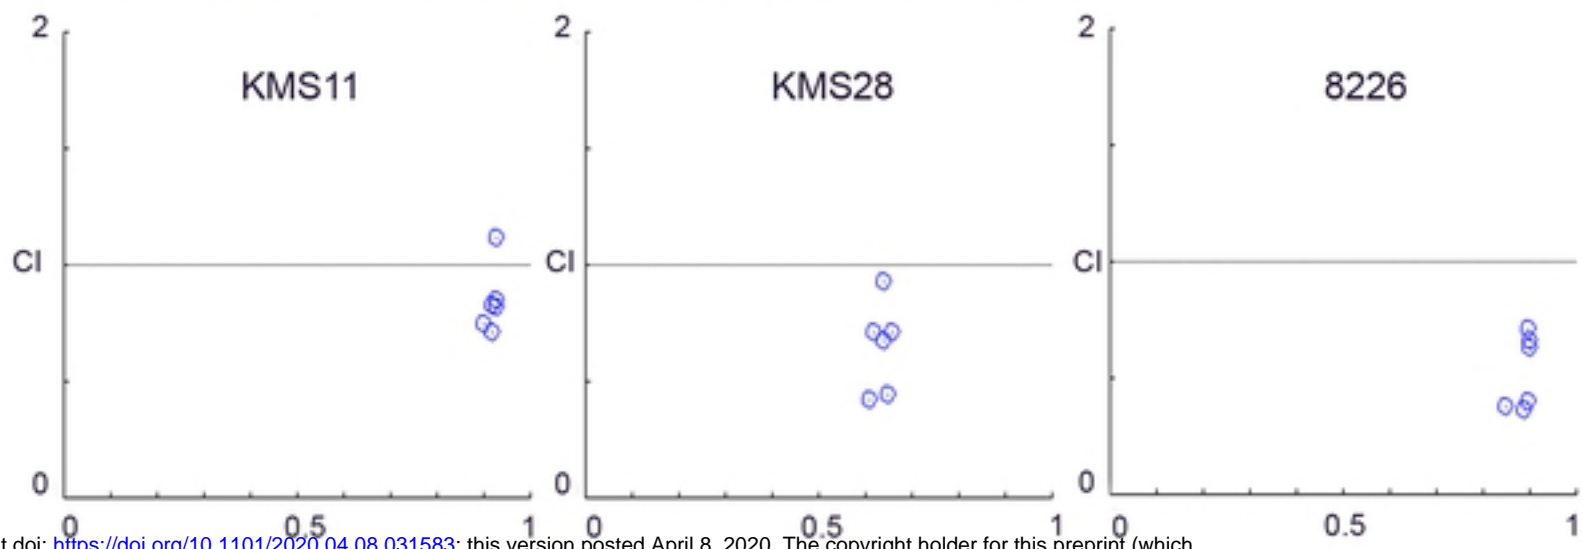

bioRxiv preprint doi: <https://doi.org/10.1101/2020.04.08.031583>; this version posted April 8, 2020. The copyright holder for this preprint (which was not certified by peer review) is the author/funder, who has granted bioRxiv a license to display the preprint in perpetuity. It is made available under aCC-BY 4.0 International license.

A

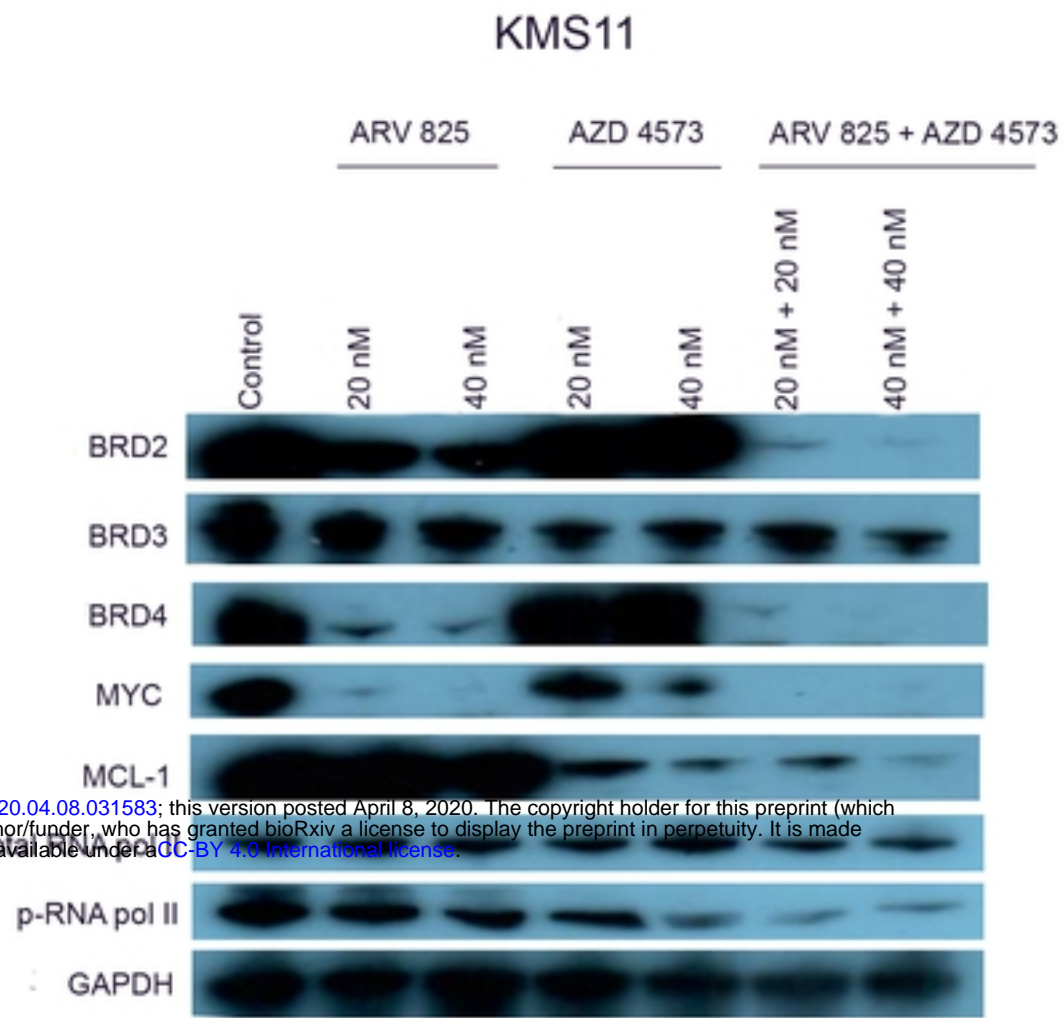

bioRxiv preprint doi: <https://doi.org/10.1101/2020.04.08.031583>; this version posted April 8, 2020. The copyright holder for this preprint (which was not certified by peer review) is the author/funder, who has granted bioRxiv a license to display the preprint in perpetuity. It is made available under aCC-BY 4.0 International license.

B

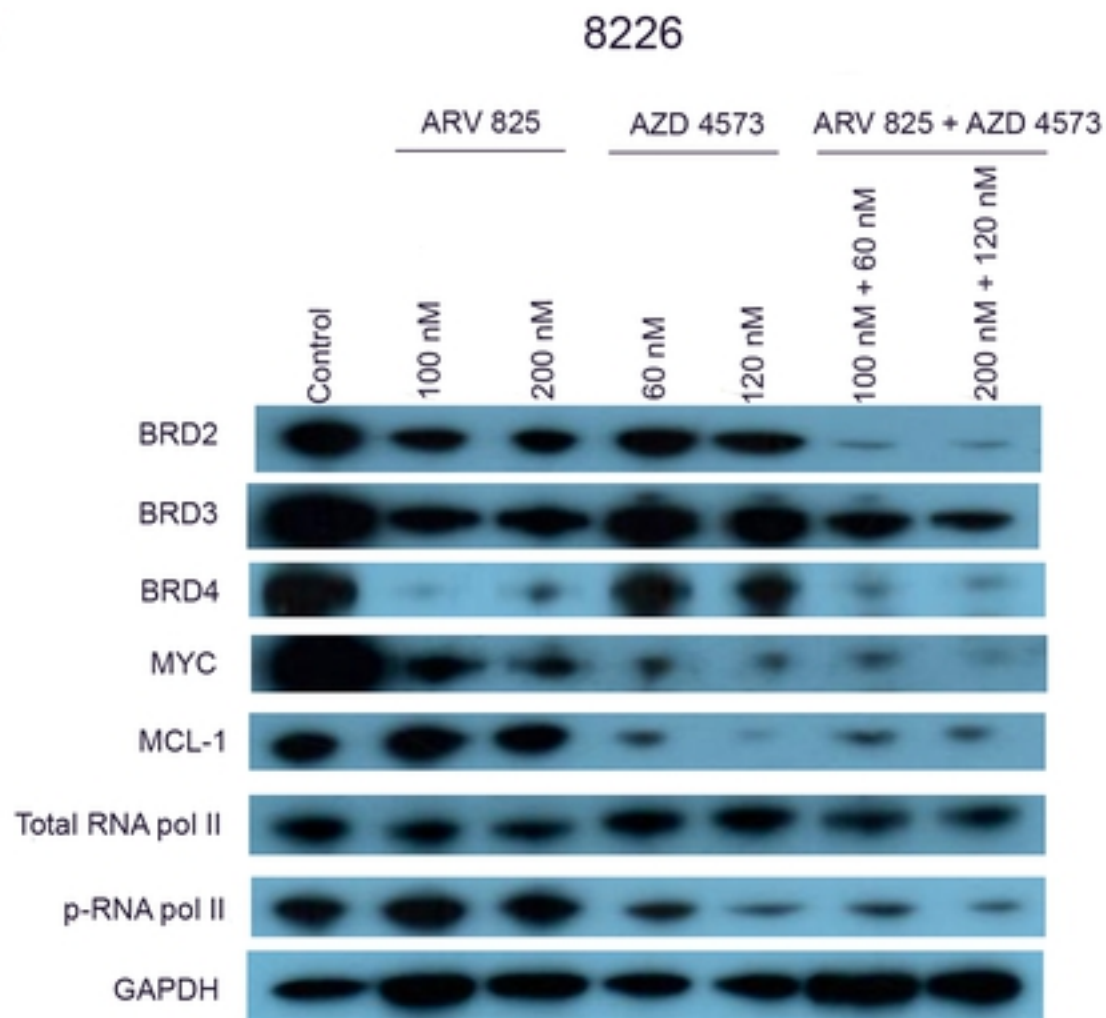

A

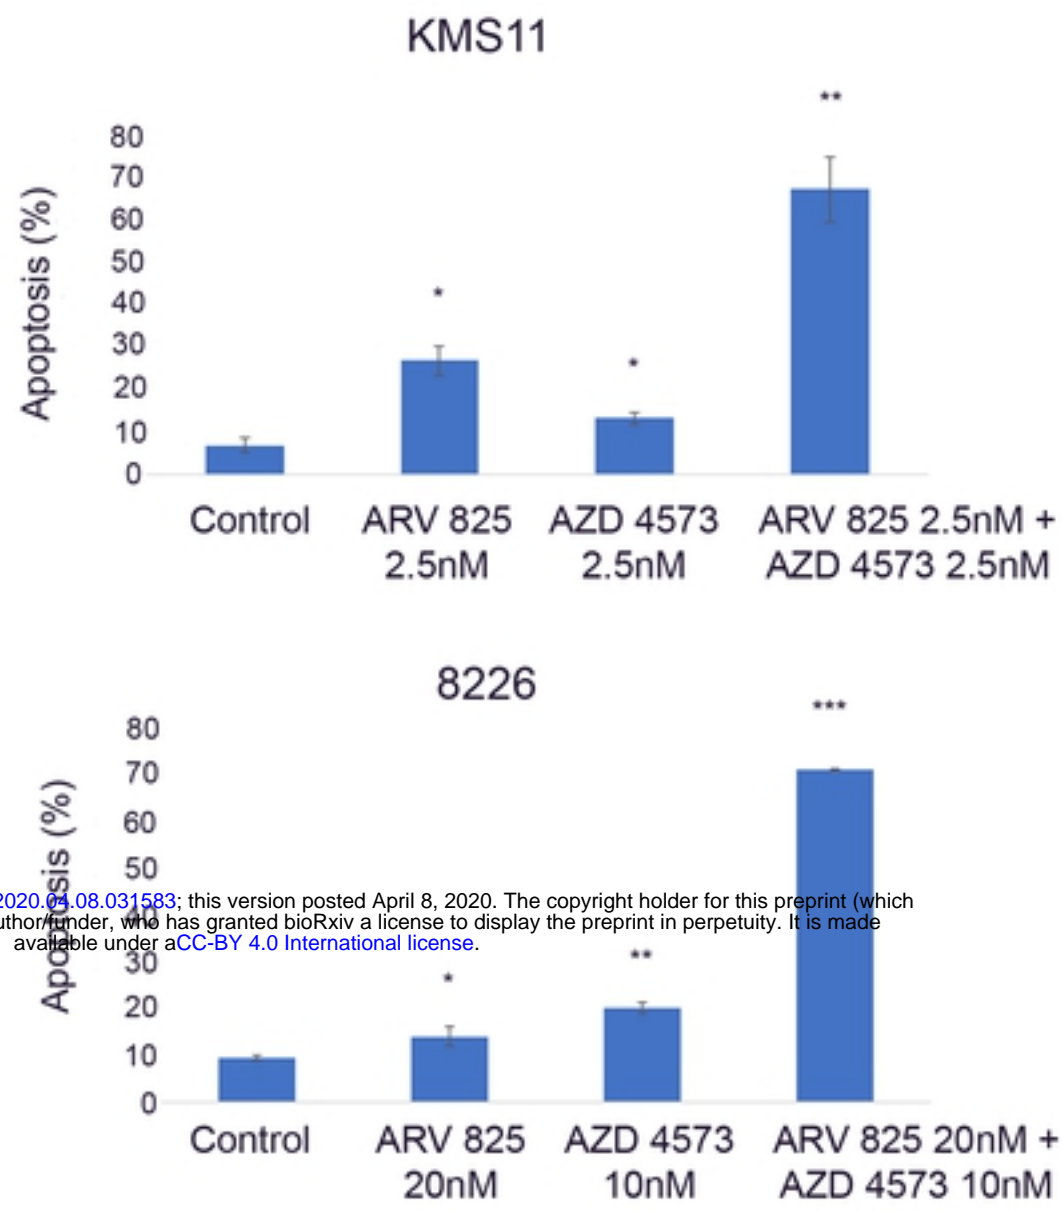

bioRxiv preprint doi: <https://doi.org/10.1101/2020.04.08.031583>; this version posted April 8, 2020. The copyright holder for this preprint (which was not certified by peer review) is the author/funder, who has granted bioRxiv a license to display the preprint in perpetuity. It is made available under aCC-BY 4.0 International license.

B

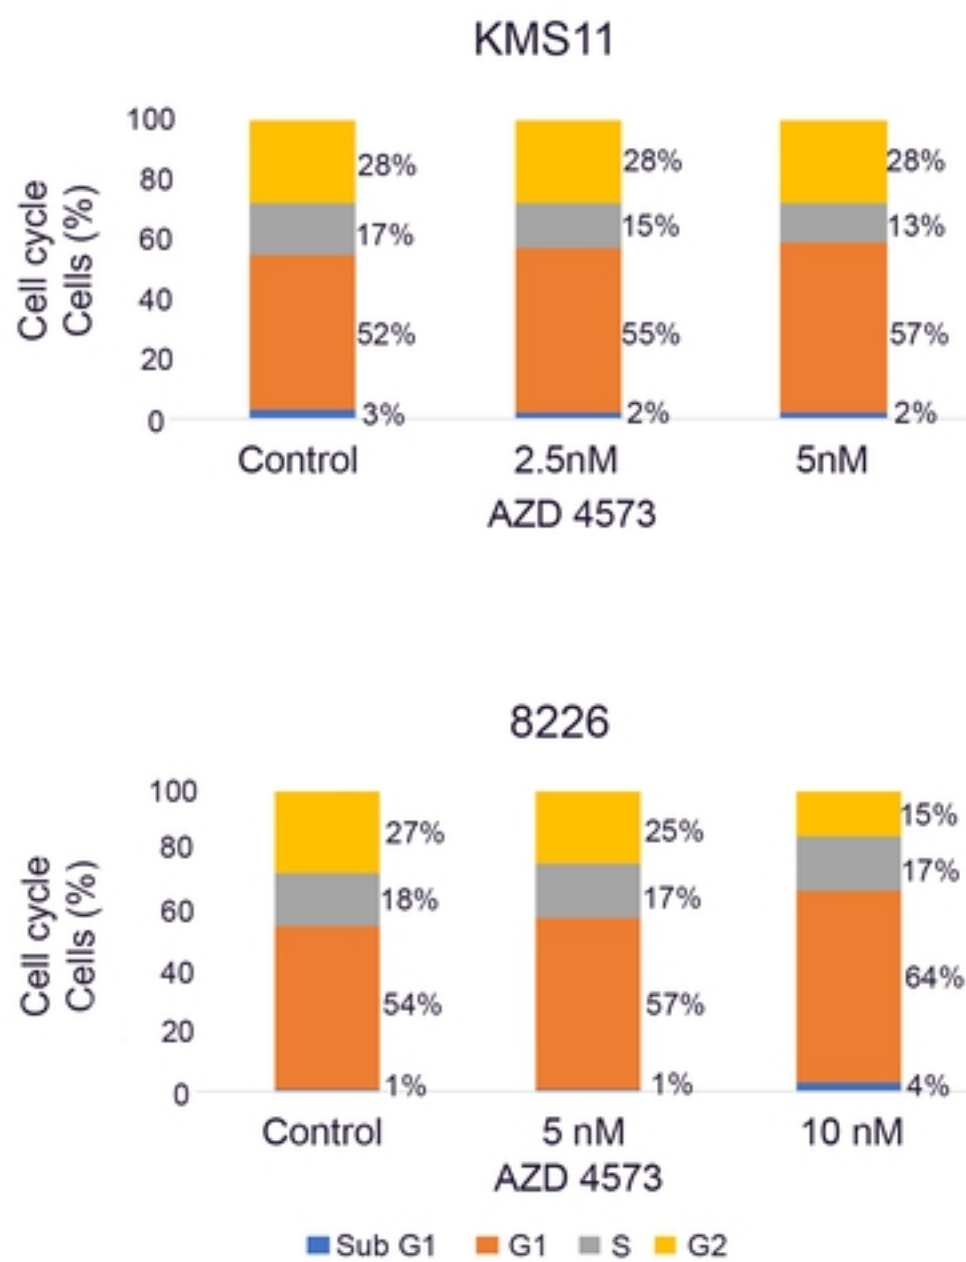

Fig 5



A

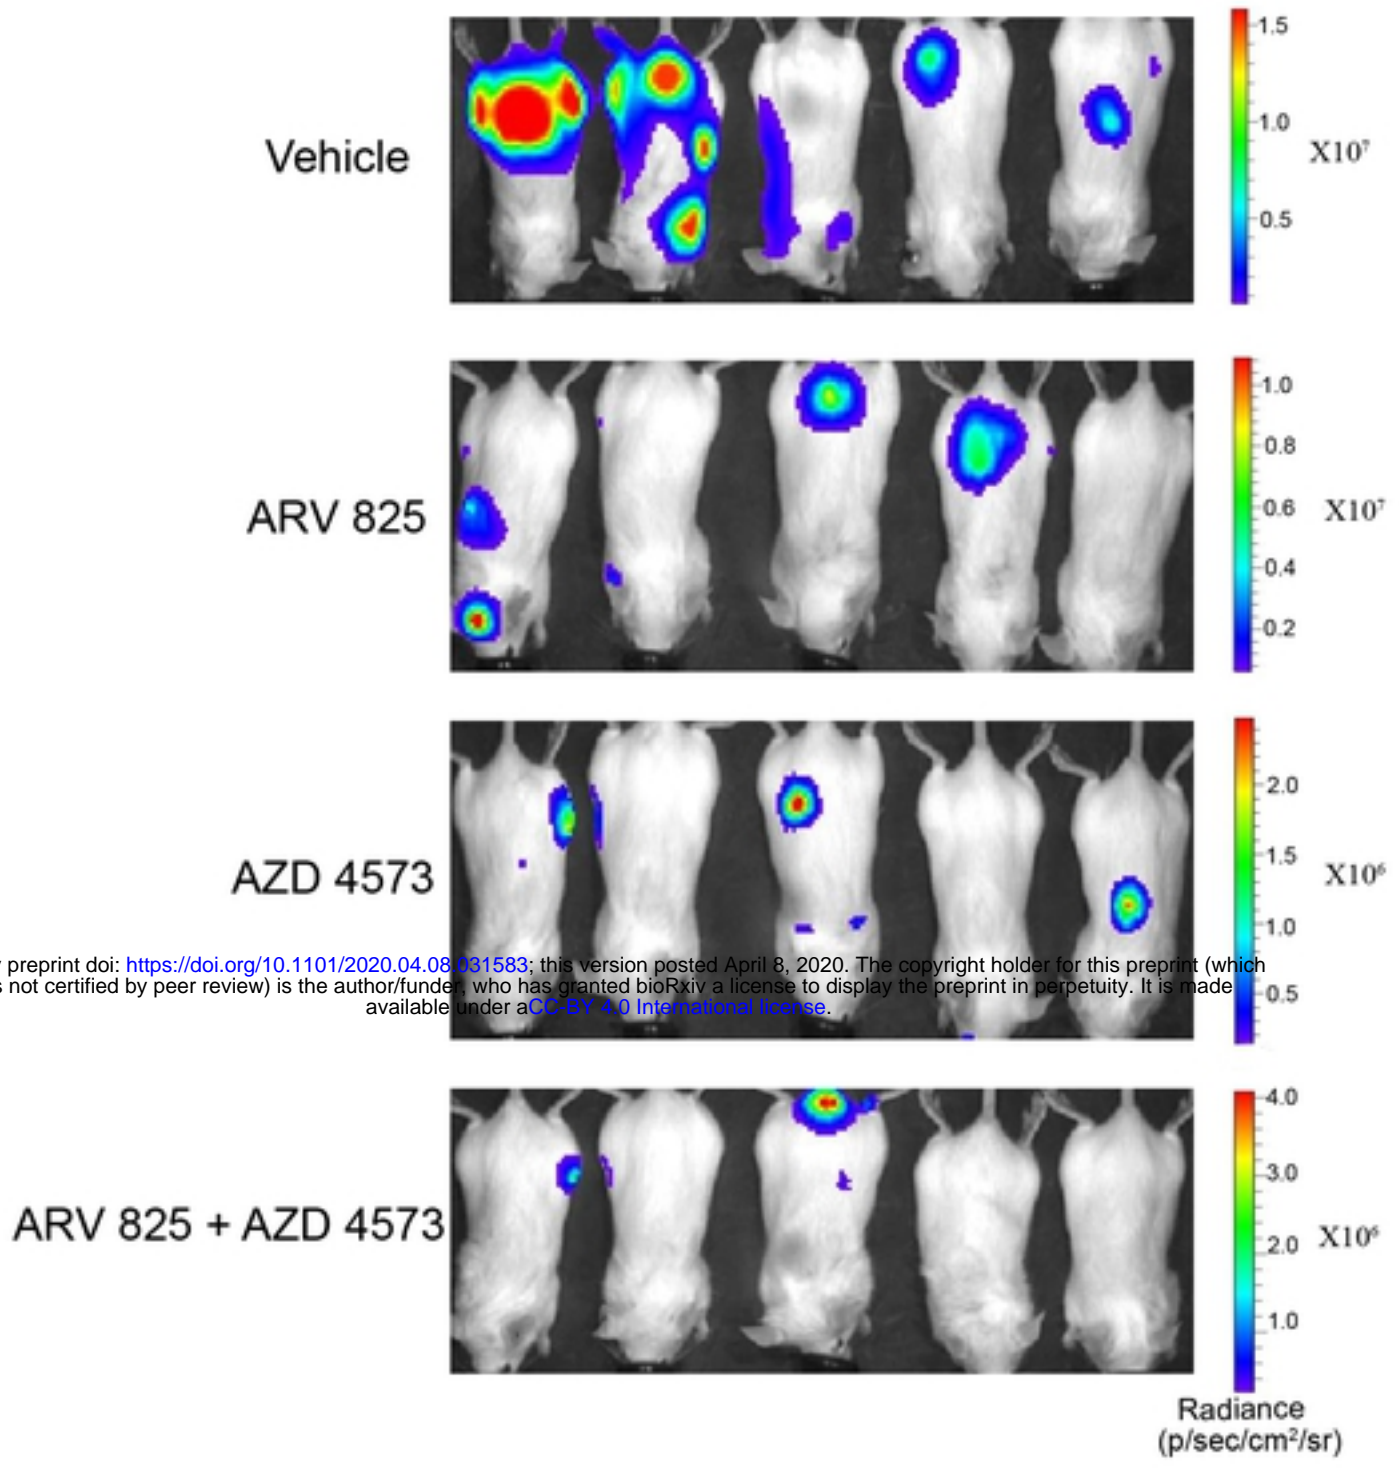

B

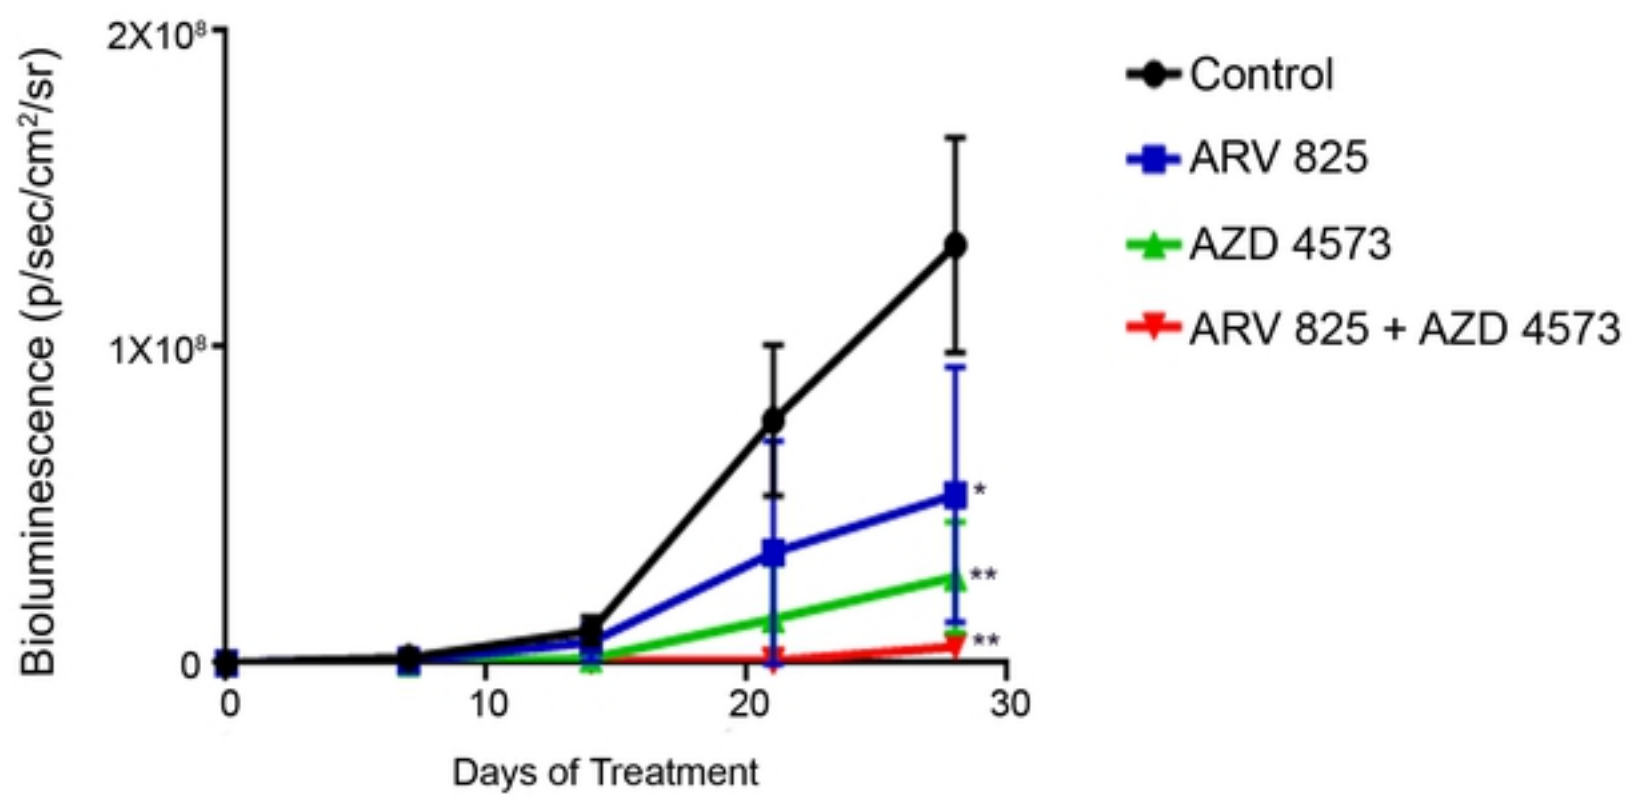

Fig 6
